# Supplementary material for: Deep sequencing of yeast and mouse tRNAs and tRNA fragments using OTTR
Source: eLife journal article supplement (doi:10.7554/elife.77616), 2025-04-25

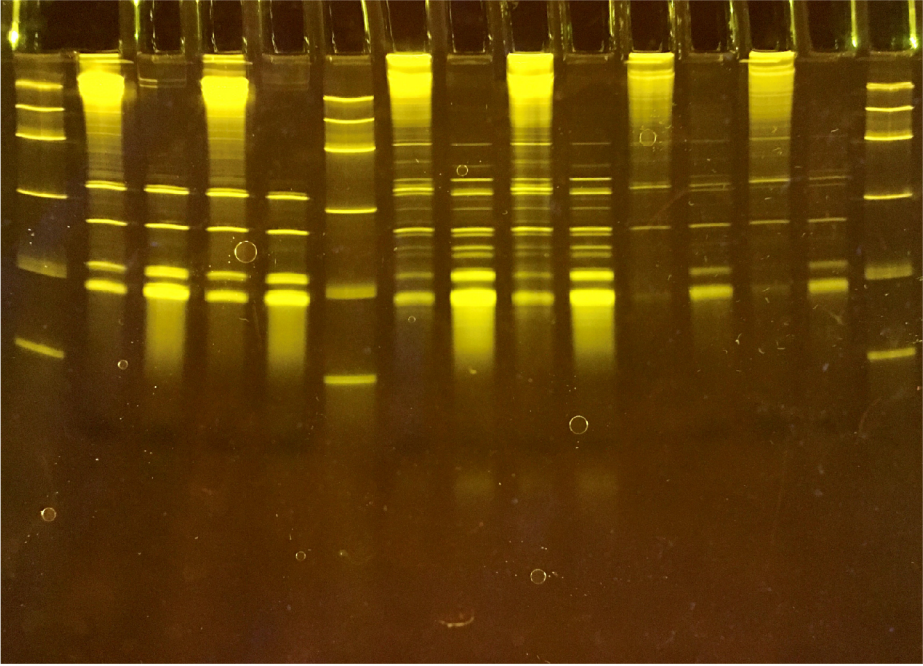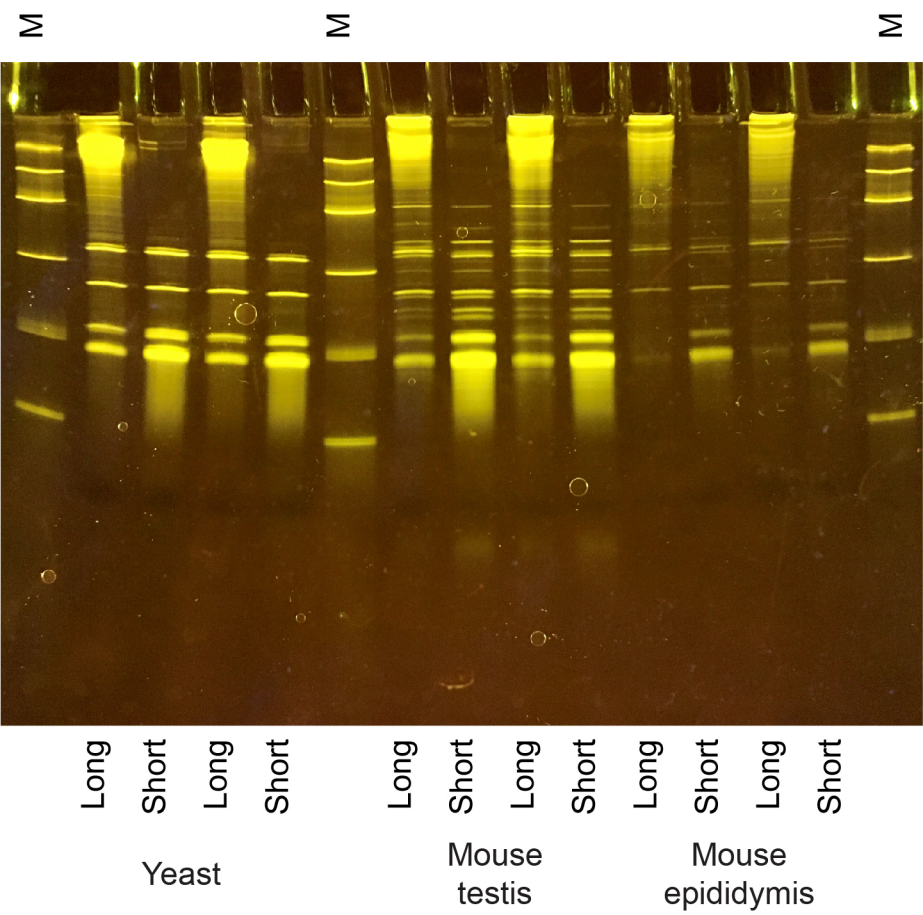

Supplement: supp [file elife-77616-supp-v1.zip]
